# Supplementary material
Source: PubMed Central journal article supplement (PMC6547285)
Supplement: ofa-0012-0167-s01.pdf [file ofa-0012-0167-s01.pdf]

## SUPPLEMENTARY DATA

| TEMd survey study centers                                                                                                                                      | Names of the researchers                                                                                   |
|----------------------------------------------------------------------------------------------------------------------------------------------------------------|------------------------------------------------------------------------------------------------------------|
| Trakya University, School of Medicine, Department of Endocrinology and Metabolism                                                                              | Semra AYTURK                                                                                               |
| Corlu REYAP Private Hospital, Department of Endocrinology and Metabolism                                                                                       | Murat YILMAZ                                                                                               |
| Canakkale 18 March University, School of Medicine, Department of Endocrinology and Metabolism,                                                                 | Mehmet ASIK                                                                                                |
| Istanbul University, School of Medicine, Department of Endocrinology and Metabolism,                                                                           | Nevin DINCCAG, Ramazan CAKMAK, Fulya TURKER, Cemile IDIZ, Hulya HACISAHINOGLU, Elif BAGDEMIR, Busra YILDIZ |
| Istanbul University, Cerrahpasa , School of Medicine, Department of Endocrinology and Metabolism,                                                              | Ozlem HALILOGLU                                                                                            |
| University of Health Sciences, School of Medicine, Fatih Sultan Mehmet Training and Research Hospital, Department of Endocrinology and Metabolism              | Seda SANCAK                                                                                                |
| University of Health Sciences, School of Medicine, Sultanabulhamit Training and Research Hospital, Department of Endocrinology and Metabolism                  | Levent OZSARI, Eylem CAGILTAY                                                                              |
| Marmara University, School of Medicine, Department of Endocrinology and Metabolism                                                                             | Eren IMRE                                                                                                  |
| İstanbul Science University, School of Medicine, Department of Endocrinology and Metabolism                                                                    | SAIT GONEN, S.Nur BOYSAN                                                                                   |
| University of Health Sciences, School of Medicine, Sisli Hamidiye Etfal Training and Research Hospital, Department of Endocrinology and Metabolism             | Yuksel ALTUNTAS, Feyza Yener OZTURK                                                                        |
| University of Health Sciences, School of Medicine, İstanbul Bakırkoy Dr. Sadi Konuk Training and Research Hospital, Department of Endocrinology and Metabolism | Meral MERT, Hamide PISKINPASA                                                                              |
| Yeditepe University, School of Medicine, Department of Endocrinology and Metabolism                                                                            | Hasan AYDIN                                                                                                |
| Private Office                                                                                                                                                 | Sazi IMAMOGLU                                                                                              |
| Uludag University, School of Medicine, Department of Endocrinology and Metabolism                                                                              | Canan ERSOY, Ozen OZ GUL                                                                                   |
| Kocaeli University, School of Medicine, Department of Endocrinology and Metabolism                                                                             | Alev SELEK                                                                                                 |
| Balikesir University, School of Medicine, Department of Internal Medicine                                                                                      | Teoman DOGRU, Ali KIRIK                                                                                    |
| Eskisehir Osmangazi University, School of Medicine, Department of Endocrinology and Metabolism                                                                 | Nur KEBAPCI, Belgin EFE                                                                                    |
| Necmettin Erbakan University, School of Medicine, Department of Endocrinology and Metabolism                                                                   | Ahmet KAYA, Ilker CORDAN                                                                                   |
| Selcuk University, School of Medicine, Department of Endocrinology and Metabolism                                                                              | Cem Onur KIRAC                                                                                             |
| University of Health Sciences, Gulhane School of Medicine and Gulhane Training and Research Hospital, Department of Endocrinology and Metabolism               | Zehra CAPA                                                                                                 |
| Private Guven Hospital, Department of Endocrinology and Metabolism                                                                                             | Mustafa CESUR                                                                                              |
| Gazi University, School of Medicine, Department of Endocrinology and Metabolism                                                                                | Ilhan YETKIN                                                                                               |

|                                                                                                                                                                 |                                               |
|-----------------------------------------------------------------------------------------------------------------------------------------------------------------|-----------------------------------------------|
| Ankara University, School of Medicine,<br>Department of Endocrinology and Metabolism                                                                            | Demet CORAPCIOGLU, Sule CANLAR                |
| Hacettepe University, School of Medicine,<br>Department of Endocrinology and Metabolism                                                                         | Okan Bulent YILDIZ, Suleyman Nahit<br>SENDUR  |
| Yıldırım Beyazıt University, School of<br>Medicine, Department of Endocrinology and<br>Metabolism                                                               | Bekir ÇAKIR, Didem ÖZDEMİR                    |
| Ufuk University, School of Medicine, Department<br>of Endocrinology and Metabolism                                                                              | Ahmet CORAKCI                                 |
| Private Bayındır Hospital, Department of<br>Endocrinology and Metabolism                                                                                        | Mustafa KUTLU                                 |
| Baskent University, School of Medicine,<br>Department of Endocrinology and Metabolism                                                                           | Neslihan BASCIL TUTUNCU, Yusuf<br>BOZKUS      |
| University of Health Sciences, School of<br>Medicine, Diskapi Yıldırım Beyazıt Training and<br>Research Hospital, Department of Endocrinology<br>and Metabolism | Erman ÇAKAL                                   |
| TOBB University, School of Medicine,<br>Department of Endocrinology and Metabolism                                                                              | Berrin DEMİRBAS                               |
| Private Memorial Hospital, Department of<br>Endocrinology and Metabolism                                                                                        | Sibel ERTEK                                   |
| University of Health Sciences, School of<br>Medicine, Keçioren Training and Research<br>Hospital, Department of Endocrinology and<br>Metabolism                 | Mustafa ALTAY, Murat DAGDEVİREN               |
| Erciyes University, School of Medicine,<br>Department of Endocrinology and Metabolism                                                                           | Amir Hasein ABEDI                             |
| Ege University, School of Medicine, Department<br>of Endocrinology and Metabolism                                                                               | Sevki ÇETİNKALP, Hatice ÖZİSİK                |
| Dokuz Eylül University, School of Medicine,<br>Department of Endocrinology and Metabolism                                                                       | Serkan YENER                                  |
| Adnan Menderes University, School of Medicine,<br>Department of Endocrinology and Metabolism                                                                    | Engin GÜNEY, Mustafa UNUBOL                   |
| Pamukkale University, School of Medicine,<br>Department of Endocrinology and Metabolism                                                                         | Guzin Fidan YAYLALI, Senay TOPSAKAL           |
| Celal Bayar University, School of Medicine,<br>Department of Endocrinology and Metabolism                                                                       | Zeliha HEKİMSOY                               |
| Mugla University, School of Medicine,<br>Department of Endocrinology and Metabolism                                                                             | Gulhan AKBABA                                 |
| University of Health Sciences, School of<br>Medicine, Antalya Training and Research<br>Hospital, Department of Endocrinology and<br>Metabolism                  | Ibrahim ASLAN                                 |
| Akdeniz University, School of Medicine,<br>Department of Endocrinology and Metabolism                                                                           | Mustafa Kemal BALCI, Sefika DALKIRAN          |
| Mersin University, School of Medicine,<br>Department of Endocrinology and Metabolism                                                                            | Esen AKBAY                                    |
| Kahramanmaraş Sutcu Imam University, School<br>of Medicine, Department of Endocrinology and<br>Metabolism                                                       | Kamile GÜL                                    |
| Private Defne Hospital, Department of<br>Endocrinology and Metabolism                                                                                           | Kemal AĞBAHT                                  |
| Mustafa Kemal University, School of Medicine,<br>Department of Endocrinology and Metabolism                                                                     | Müge Özsan YILMAZ                             |
| Baskent University, Adana Training Hospital,<br>Department of Endocrinology and Metabolism                                                                      | Emre BOZKIRLI                                 |
| Cukurova University, School of Medicine,<br>Department of Endocrinology and Metabolism                                                                          | B. Tamer TETİKER, Seher ÇETİNKAYA<br>ALTUNTAS |
| 19 Mayıs University, School of Medicine,<br>Department of Endocrinology and Metabolism                                                                          | Aysegül ATMACA, Elif Tutku Durmuş             |
| University of Health Sciences, School of<br>Medicine, Samsun Training and Research<br>Hospital, Department of Endocrinology and<br>Metabolism                   | Turkan METE                                   |
| Giresun University, School of Medicine,<br>Department of Endocrinology and Metabolism                                                                           | Oğuz DİKBAS                                   |

|                                                                                                          |                                      |
|----------------------------------------------------------------------------------------------------------|--------------------------------------|
| Recep Tayyip Erdogan University, School of Medicine, Department of Endocrinology and Metabolism          | Safak AKIN                           |
| Karadeniz Technical University, School of Medicine, Department of Endocrinology and Metabolism           | Irfan NUHOGLU, Halil Onder ERSOZ     |
| Bulent Ecevit University, School of Medicine, Department of Endocrinology and Metabolism                 | Taner BAYRAKTAROGLU                  |
| Kars Harakani State Hospital, Department of Endocrinology and Metabolism                                 | Pinar SISMAN                         |
| Inonu University, School of Medicine, Department of Endocrinology and Metabolism                         | Ibrahim SAHIN, Sedat CETIN           |
| Erzincan University, School of Medicine, Department of Endocrinology and Metabolism                      | Ilyas CAPOGLU, Emin Murat AKBAS      |
| Yuzuncu Yil University, School of Medicine, Department of Endocrinology and Metabolism                   | Rifki UCLER                          |
| Harran University, School of Medicine, Department of Endocrinology and Metabolism                        | Mehmet Ali EREN                      |
| Dicle University, School of Medicine, Department of Endocrinology and Metabolism                         | Alpaslan Kemal TUZCU, Zafer PEKKOLAY |
| University of Health Sciences, School of Medicine, Gaziantep Ersin Arslan Research and Training Hospital | Mesut OZKAYA                         |
| Gaziantep University, School of Medicine, Department of Endocrinology and Metabolism                     | Mustafa ARAZ                         |
| Liv Hospital Ulus, Istanbul, Department of Endocrinology and Metabolism                                  | Serpil SALMAN                        |
| Kayseri Education and Research Hospital, Department of Internal Medicine                                 | Oguzhan Sitki DIZDAR                 |
| Mustafa Kemal University, Department of Endocrinology and Metabolism                                     | Eren GURKAN                          |
| Erzurum Regional Education and Research Hospital, Department of Endocrinology and Metabolism             | Ayşe KARGILI CARLIOGLU               |
